# Supplementary material for: Improving the photocatalytic activity of polyaniline and a porphyrin via oxidation to obtain a salt and a charge-transfer complex
Source: Royal Society of Chemistry journal article supplement (doi:10.1039/c7nj02399e), 2017-01-01
Supplement: c7nj02399e1.pdf [file c7nj02399e1.pdf]

## **Electronic Supplementary Information for:**

### **Improving the photocatalytic activity of polyaniline and a porphyrin *via* oxidation to obtain a salt and a charge-transfer complex.**

**Ramesh Gottam<sup>a</sup>, Palaniappan Srinivasan<sup>\*a,b</sup>, Duong Duc La<sup>c</sup>, Sheshanath V. Bhosale<sup>\*,c</sup>**

<sup>a</sup> Polymers & Functional Materials Division, CSIR-Indian Institute of Chemical Technology,  
Email: palani74@rediffmail.com

<sup>b</sup> CSIR – Network Institutes for Solar Energy, New Delhi, INDIA

<sup>c</sup> School of Science, RMIT University, GPO Box 2476, Melbourne Victoria 3001 Australia; Tel:  
+61 3 9925 2680, Email: sheshanath.bhosale@rmit.edu.au

## **Table of Contents**

**Fig. S1** Adsorption and desorption isotherms of (a) PANI-H<sub>2</sub>SO<sub>4</sub> (b) PANI-H<sub>2</sub>SO<sub>4</sub>-TKHP-50 (c) PANI-H<sub>2</sub>SO<sub>4</sub>-TKHP-100

**Fig. S2** FT-IR spectra of TKHP, PANI-H<sub>2</sub>SO<sub>4</sub>-TKHP-50 and PANI-H<sub>2</sub>SO<sub>4</sub>-TKHP-100.

**Fig. S3** XRD patterns of PANI-H<sub>2</sub>SO<sub>4</sub>, TKHP, PANI-H<sub>2</sub>SO<sub>4</sub>-TKHP-50 and PANI-H<sub>2</sub>SO<sub>4</sub>-TKHP-100.

**Fig. S4** SAED patterns of the (a) PANI- H<sub>2</sub>SO<sub>4</sub>-TKHP-50 (b) PANI-H<sub>2</sub>SO<sub>4</sub>-TKHP-100.

**Fig. S5** UV-vis spectra of RhB degradation by PANI-H<sub>2</sub>SO<sub>4</sub>; (B) PANI-H<sub>2</sub>SO<sub>4</sub>-TKHP-100 and (C) PANI-H<sub>2</sub>SO<sub>4</sub>-TKHP-50 composite.

**Fig. S6.** ESR spectra of PANI samples and TKHP sample.

**Fig. S7** CV of (a) TKHP (b) PANI-H<sub>2</sub>SO<sub>4</sub> in 0.1 M TBAPF<sub>6</sub> in ACN

**Fig. S8** Energy levels of PANI-H<sub>2</sub>SO<sub>4</sub> and TKHP

**Table S1.** d-values for the system (a) conventional polyaniline salt, (b) PANI-H<sub>2</sub>SO<sub>4</sub>, (c) PANI-H<sub>2</sub>SO<sub>4</sub>-TKHP-50, (d) PANI-H<sub>2</sub>SO<sub>4</sub>-TKHP-100 and (e) TKHP obtained from XRD.

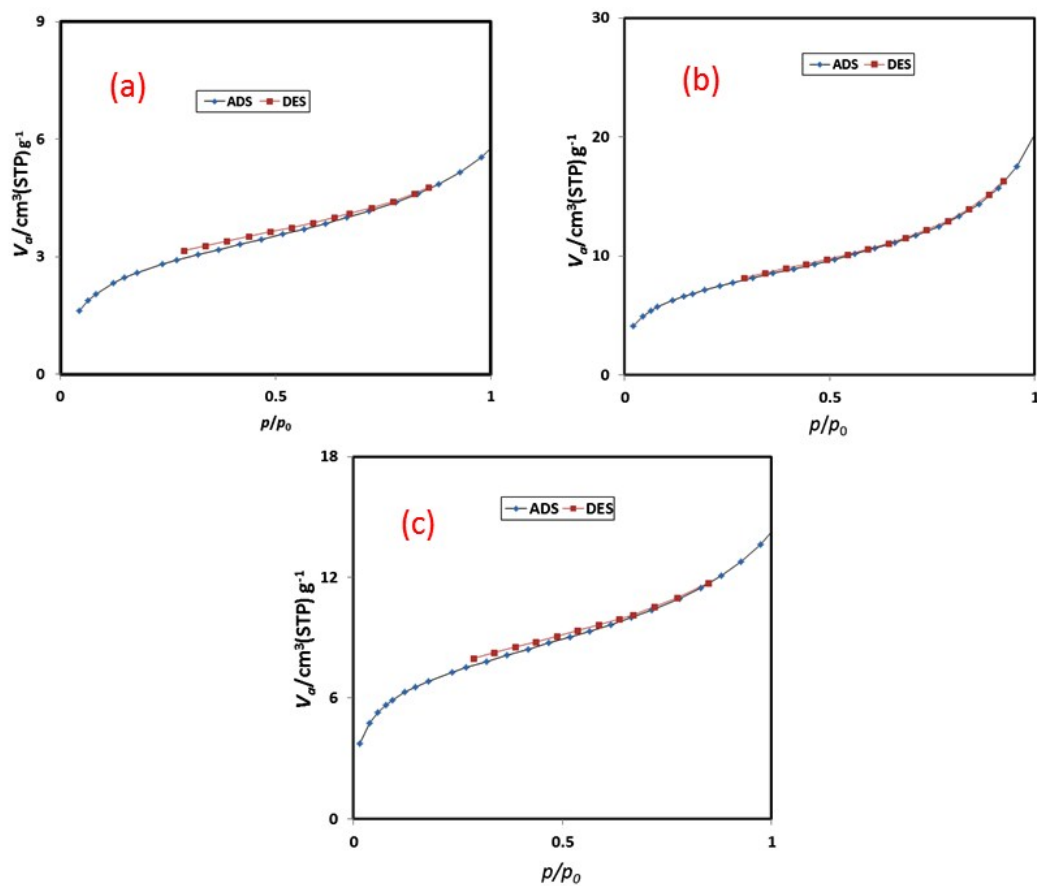

**Fig. S1** Adsorption and desorption isotherms of (a) PANI-H<sub>2</sub>SO<sub>4</sub> (b) PANI-H<sub>2</sub>SO<sub>4</sub>-TKHP-50 (c) PANI-H<sub>2</sub>SO<sub>4</sub>-TKHP-100.

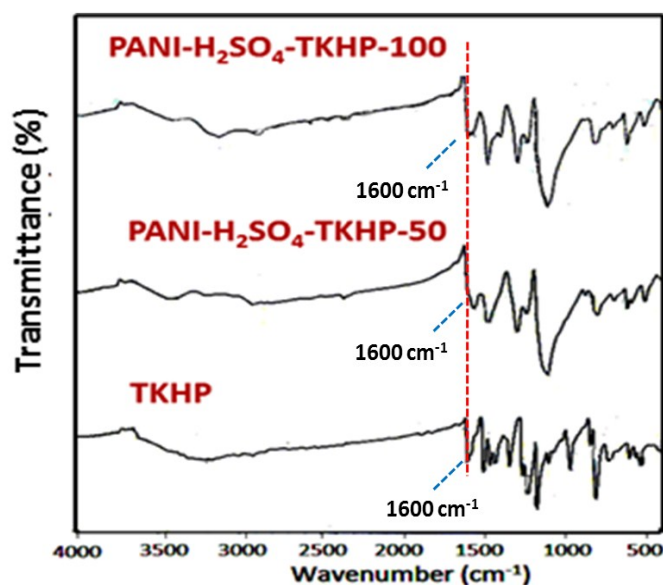

**Fig. S2** FT-IR spectra of TKHP, PANI-H<sub>2</sub>SO<sub>4</sub>-TKHP-50 and PANI-H<sub>2</sub>SO<sub>4</sub>-TKHP-100.

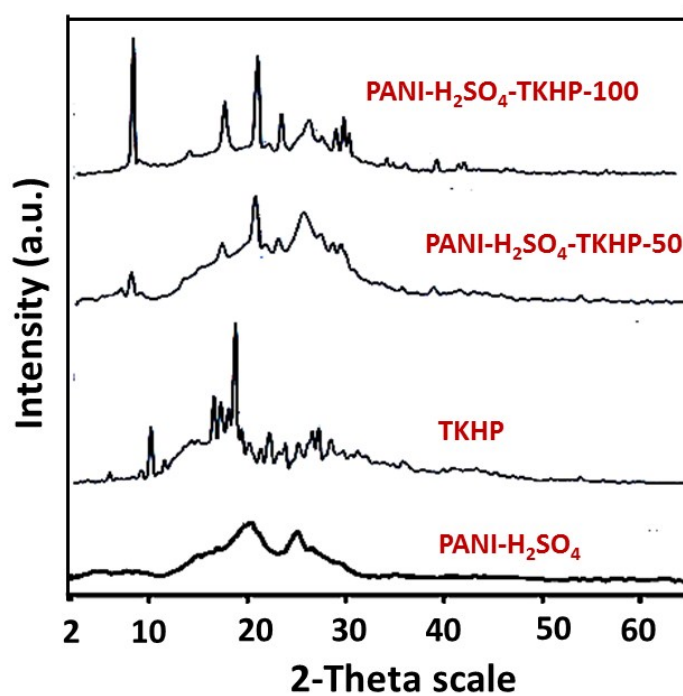

**Fig. S3** XRD patterns of PANI-H<sub>2</sub>SO<sub>4</sub>, TKHP, PANI-H<sub>2</sub>SO<sub>4</sub>-TKHP-50 and PANI-H<sub>2</sub>SO<sub>4</sub>-TKHP-100.

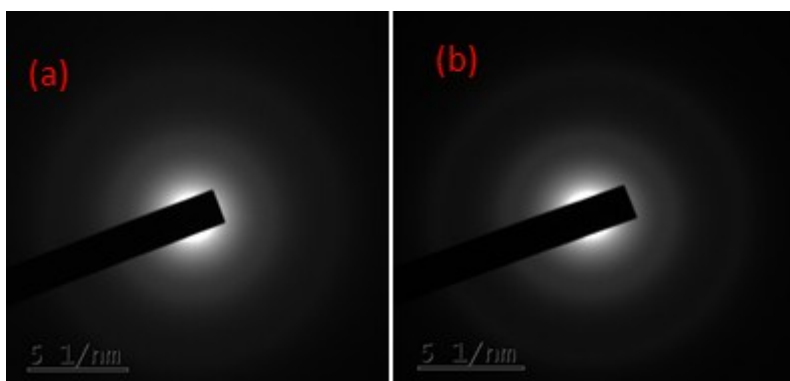

**Fig. S4** SAED patterns of the (a) PANI- H<sub>2</sub>SO<sub>4</sub>-TKHP-50 (b) PANI-H<sub>2</sub>SO<sub>4</sub>-TKHP-100.

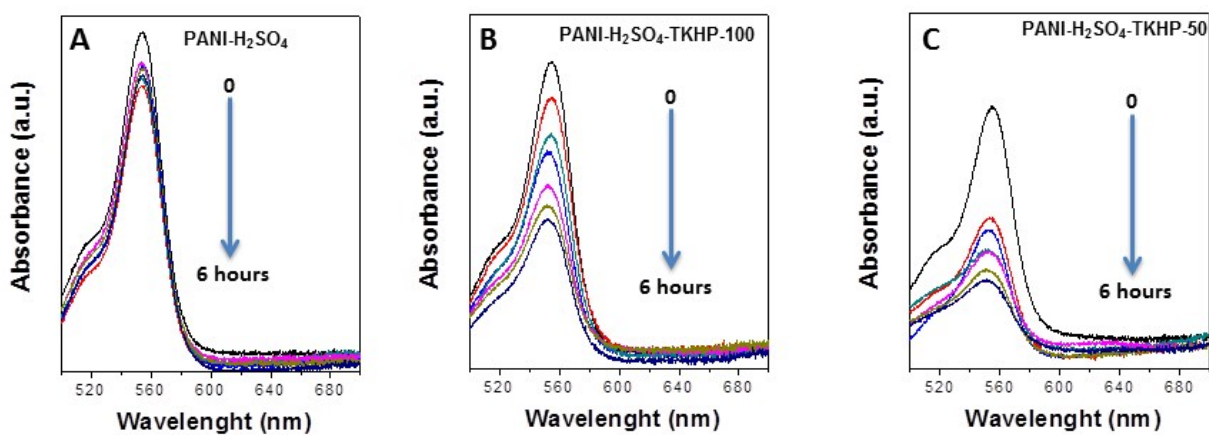

**Fig. S5** UV-vis spectra of RhB degradation by PANI-H<sub>2</sub>SO<sub>4</sub> (B) PANI-H<sub>2</sub>SO<sub>4</sub>-TKHP-100 and (C) PANI-H<sub>2</sub>SO<sub>4</sub>-TKHP-50 composite.

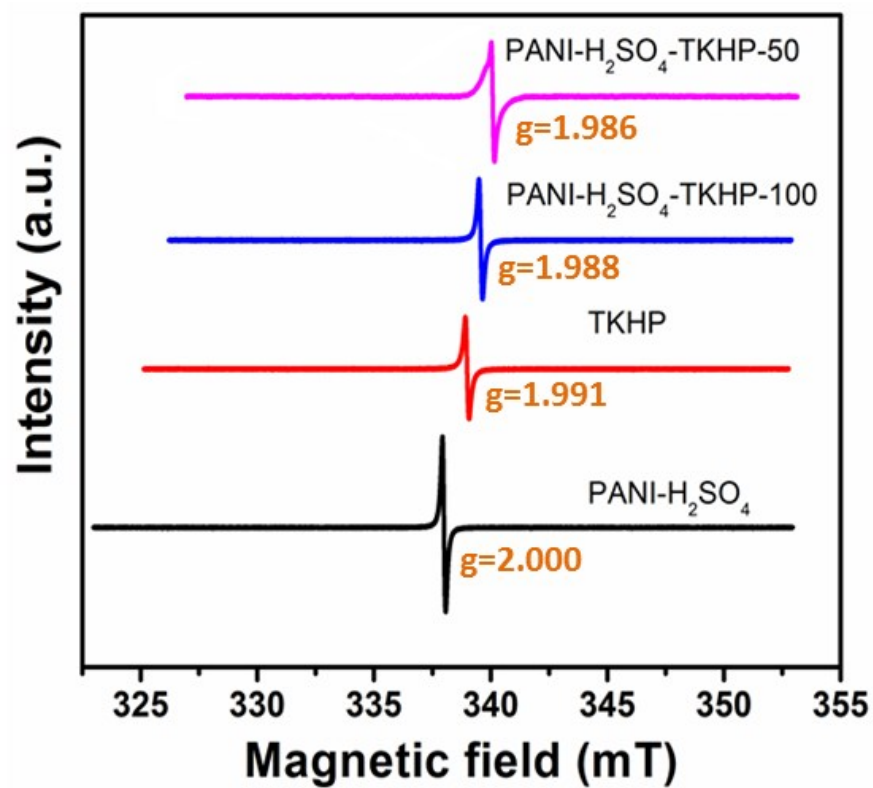

**Figure S6.** ESR spectra of PANI samples and TKHP sample.

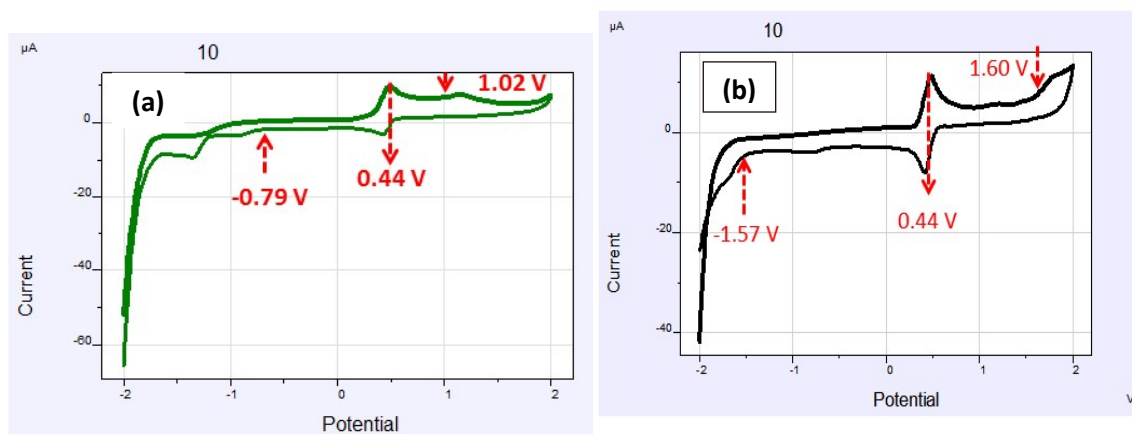

**Fig. S7** CV of (a) TKHP (b) PANI-H<sub>2</sub>SO<sub>4</sub> in 0.1 TBAPF<sub>6</sub> in ACN

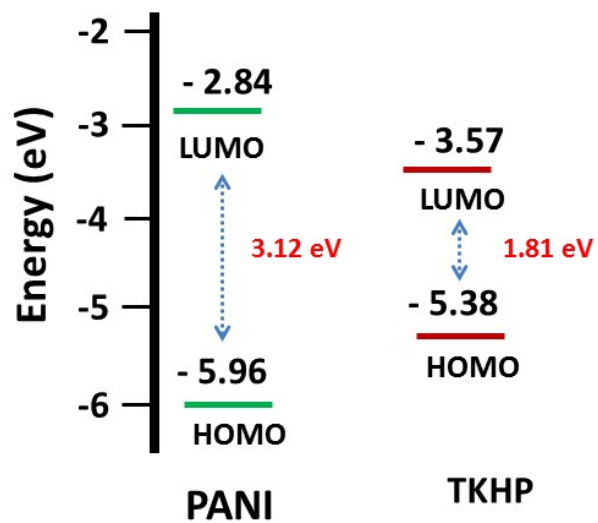

**Fig. S8** Energy levels of PANI-H<sub>2</sub>SO<sub>4</sub> and TKHP

**Table S1** d-values for the system (a) conventional polyaniline salt, (b) PANI-H<sub>2</sub>SO<sub>4</sub>, (c) PANI-H<sub>2</sub>SO<sub>4</sub>-TKHP-50, (d) PANI-H<sub>2</sub>SO<sub>4</sub>-TKHP-100 and (e) TKHP obtained from XRD.

|          |      |       |      |      |      |      |      |      |      |      |      |      |      |      |      |      |      |      |
|----------|------|-------|------|------|------|------|------|------|------|------|------|------|------|------|------|------|------|------|
| <b>a</b> |      |       | 5.58 | 4.40 |      |      | 3.55 | 3.29 |      |      |      |      |      |      |      |      |      |      |
| <b>b</b> |      |       |      | 4.40 |      |      | 3.55 |      |      |      |      |      |      |      |      |      |      |      |
| <b>c</b> |      | 11.77 |      | 5.24 |      | 4.37 |      | 3.91 |      | 3.52 |      | 3.29 |      | 3.15 |      | 3.06 |      | 3.00 |
| <b>d</b> |      | 11.79 |      | 5.23 |      | 4.37 |      | 3.90 |      | 3.47 |      | 3.30 |      | 3.14 |      | 3.06 |      | 3.01 |
| <b>e</b> | 9.07 | 7.91  | 5.46 | 5.24 | 5.00 | 4.82 | 4.64 | 4.46 | 4.21 | 4.04 | 3.87 | 3.77 | 3.57 | 3.43 | 3.38 | 3.30 | 3.15 |      |
